# Supplementary material
Source: PubMed Central journal article supplement (PMC5621721)
Supplement: ry162287suppa1.pdf [file ry162287suppa1.pdf]

**Table E1. Tissue Stiffness Comparison between Hand-Traced and Automated ROIs**

| IVD Region | Count | Stiffness (kPa) |               |                    |
|------------|-------|-----------------|---------------|--------------------|
|            |       | Hand Traced ROI | Automated ROI | Mean Difference*   |
| AF         | 181   | 98.55 ± 13.46   | 99.82 ± 14.53 | -1.2 (-8.7, 6.3)   |
| NP         | 181   | 14.13 ± 1.72    | 14.16 ± 2.29  | -0.032 (-2.8, 2.8) |

Note.—Unless otherwise indicated, data are means ± standard deviation.

\* Data in parentheses are 95% confidence intervals.

**Table E2. Agreement of Assigned Pfirrmann Scoring**

| Grader | Intrarater Agreement Interclass Correlation | P Value |
|--------|---------------------------------------------|---------|
| 1      | 0.976 (0.970, 0.980)                        | <.001   |
| 2      | 0.956 (0.945, 0.965)                        | <.001   |
| 3      | 0.969 (0.961, 0.975)                        | <.001   |
| 4      | 0.981 (0.977, 0.985)                        | <.001   |
| 5      | 0.956 (0.945, 0.965)                        | <.001   |

Note.—Data in parentheses are 95% confidence intervals. For interrater agreement, complete agreement between all three replicate scores of all five scorers was 22.7%.
